1 **On-farm hatching and contact with adult hen post hatch induce sex-**  
2 **dependent effects on performance and welfare in broiler chickens**

3

4 L. A. Guilloteau<sup>a\*</sup>, A. Bertin<sup>b</sup>, S. Crochet<sup>a</sup>, C. Bagnard<sup>c</sup>, A. Hondelatte<sup>c</sup>, L. Ravon<sup>c</sup>, C.  
5 Schouler<sup>d</sup>, K. Germain<sup>c</sup>, A. Collin<sup>a</sup>

6

7 <sup>a</sup> *INRAE, Université de Tours, BOA, 37380 Nouzilly, France*

8 <sup>b</sup> *CNRS, IFCE, INRAE, Université de Tours, PRC, 37380 Nouzilly, France*

9 <sup>c</sup> *INRAE, EASM, 17700 Surgères, France*

10 <sup>d</sup> *INRAE, Université de Tours, ISP, 37380 Nouzilly, France*

11

12

13

14 \*Corresponding author: Laurence Guilloteau. Email: [Laurence.guilloteau@inrae.fr](mailto:Laurence.guilloteau@inrae.fr)

15

16

17 **Abstract**

18 To improve the early perinatal conditions of broiler chicks, alternative hatching systems  
19 have been developed. On-farm hatching (OFH) with an enriched microbial and  
20 stimulating environment by the presence of an adult hen is a promising solution. Day-  
21 old certified JA 757 chicks were allotted within different hatching and rearing  
22 conditions: OFH, conventional hatchery (CH), CH and post-hatching treatment with  
23 antibiotics (CH + AB), as well as both hatching systems with an adult hen at hatching

24 (OFH + H, CH + H). On day (D) 27, chickens were challenged by combining transport  
25 in boxes in a new room at a lower temperature and fasting for 4 h. On their return to  
26 the original room, the chicken density was increased, and birds were orally vaccinated  
27 with the Gumboro vaccine. The impacts of these conditions on hatchability, chick  
28 quality score, performance, health and robustness were determined. The OFH chick  
29 body weights (BW) were significantly greater than those of CH chicks at hatching.  
30 Whereas there was no effect of hatching conditions, the presence of hens, categorised  
31 according to their behaviour, decreased the hatchability rate, the quality score of OFH  
32 chicks and increased mortality at hatching. Treatment of CH chicks with antibiotics  
33 temporarily decreased chicken BW at D19, but the feed conversion ratio (FCR) was  
34 not modified. At D19, OFH chicks had the best BW compared to the other groups, and  
35 the presence of hens at hatching harmed chicken BW regardless of the hatching  
36 condition and FCR. An interaction between the effect of hatching conditions and  
37 chicken sex was observed later in BW. In males, the OFH chickens were the heaviest  
38 compared to the other groups at D34 but not at D56. The presence of hens eventually  
39 negatively impacted CH chicken BW at D56. In females, there was no effect of hatching  
40 condition on the BWs at D34 and D56, and the presence of hens eventually had a  
41 positive impact on OFH chicken BW. There was no effect of hatching conditions on  
42 health parameters. In conclusion, the OFH system was a hatching system at least  
43 equivalent to the CH system, if not better in this study. The effects of the hen's  
44 presence at hatching and during the chick start-up phase on performance interacted  
45 with the hatching condition and the sex of the chickens. The health status and brooding  
46 behaviour of the hens are essential to ensure the health and welfare of the chicks.  
47

## 48 **Introduction**

49 In poultry, the perinatal period is a stressful period for broiler chicks, which includes  
50 the hatching phase and major physiological changes to adapt to new food resources  
51 and environments. In hatcheries, chicks hatch at between 19 and 21 days of  
52 incubation. They often stay more than 12 hours in the hatcher, under optimal  
53 temperature, without light and usually without access to feed and water until placement  
54 in farm buildings. The fasting period of the chicks is further increased by the time  
55 needed for hatchery processing, transportation duration and unloading at the farm,  
56 which might last up to the first 72 h after hatching. Even though chicks can use energy  
57 reserves from their yolk sac (van der Wagt et al., 2020), these conditions induce  
58 immediate and long-lasting metabolic changes (Beauclercq et al., 2019; Foury et al.,  
59 2020), behavioural impacts by increasing fear responses (Jessen et al., 2021) and  
60 consequences on chicken development, performance and welfare (de Jong et al.,  
61 2017).

62 To improve the early perinatal conditions of chicks, alternative hatching systems have  
63 been developed. On-farm hatching provides the chicks with immediate access to feed  
64 and water according to their needs and avoids the exposure to stressors encountered  
65 in conventional hatcheries (van de Ven et al., 2009). Eggs incubated for 18 days are  
66 transported to the farm and placed either in trays or in the litter where they hatch. The  
67 effects of these on-farm hatching systems on broiler health, welfare and performance  
68 were recently studied under commercial or more controlled conditions and had shown  
69 effects that are not always beneficial. Total mortality and footpad dermatitis in on-farm  
70 hatched (OFH) chicks were lower compared to conventionally hatched (CH) fast-

71 growing broiler chickens (de Jong et al., 2019; 2020; Giersberg et al., 2021; Jessen et  
72 al., 2021). However, day-old chick quality was worse and breast myopathy prevalence  
73 was higher for OFH than CH chickens (de Jong et al., 2019; Souza da Silva et al.,  
74 2021).

75 Chicken activity and general behaviour were little affected by the hatching system, with  
76 fast-growing OFH chickens being more fearful and less active (Giersberg et al., 2020).  
77 Slower-growing broiler chickens hatched in organic farms tended to express less  
78 general fearfulness than CH chickens (Jessen et al., 2021). A positive effect on growth  
79 performance was observed during the first week of life until 21 days in OFH and CH  
80 fed at the hatchery compared to CH chickens (de Jong et al., 2020), and longer when  
81 parent flocks were young (Souza da Silva et al., 2021).

82 Maintaining optimal health, welfare and performance of chickens is highly dependent  
83 on the gut physiology in interaction with the microbiota and mucosal immune system  
84 (Fortun-Lamothe et al., 2023). Antibiotics have been largely used in poultry production  
85 to improve performance by acting on the gut barrier function (Broom, 2018). However,  
86 growing concerns about the increase of antimicrobial resistance in farm animals led to  
87 changes in EU and national legislation governing the use of antibiotics as growth  
88 promoters in poultry feed, which resulted in their suppression in 2006 (Council  
89 Directive 96/22/EC; Axis 2 and measure 19 of the EcoAntibio 2017 plan). This made it  
90 possible to become aware of the crucial role of the gut barrier and of the quality of the  
91 microbiota implanted in the chick's gut at hatching on the physiological and immune  
92 development, its robustness in the face of the hazards encountered during the chicks'  
93 lives, and consequently on performance.

94 Greater attention to the environment during the chick postnatal period, especially the  
95 microbial environment, is key to optimising the gut barrier function and more broadly  
96 the health and welfare of the chickens and their performance. Naturally, chicks hatch  
97 in contact with an adult hen who is a donor of microbiota and a model of learning and  
98 maternal care (Edgar et al., 2016). Early implantation of adult microbiota into the chick  
99 digestive system accelerates the maturation of the microbiota and immune system  
100 (Volf et al., 2016; Broom & Kogut, 2018; Meijerink et al., 2020). In addition, chicks  
101 reared in the presence of their mothers are less fearful than those raised without their  
102 mothers and develop more behavioural synchrony (Perré et al., 2002), even though  
103 hen genetics has a strong effect on chick behaviour, with commercial lines being less  
104 maternal (Hewlett et al., 2019). The combination of a new hatching system like OFH  
105 with an enriched microbiota and stimulating environment from the presence of an adult  
106 hen is a possible solution for chick conditions to be improved and could contribute to  
107 poultry health and welfare and product quality.

108 In this study, we analysed the benefits/risks of hatching systems (OFH and CH), with  
109 an adult hen (OFH + H, CH + H) or not, and the combination of CH and post-hatching  
110 treatment with antibiotic growth promoter (CH + AB) on hatchability on chick quality  
111 score, performance, health and robustness.

112

## 113 **Material and methods**

114 All experimental procedures were approved by the Ethics Committee COMETHEA  
115 POITOU-CHARENTES n°84 (APAFIS#24474-2020021816237418 v3) and carried out  
116 following current European legislation (EU Directive 2010/63/EU). All steps of hatching,

117 experimentation and rearing were done at the experimental unit (EASM, Poultry  
118 alternative breeding facility, INRAE, 17700 Surgères, France, DOI:  
119 10.15454/1.5572418326133655E12).

## 120 **Experimental design**

121 Seven hundred twenty-day-old, certified JA 757 chicks, among which 432 were from a  
122 conventional hatchery (CH) and 288 were hatched on-farm (OFH), were allocated into  
123 five groups: CH, CH + antibiotics treatment (CH + AB), CH + hen (CH + H), OFH, OFH  
124 + hen (OFH + H). Each group was randomly placed in the room, repeated in eight pens  
125 (18 chicks/pen, 3 m<sup>2</sup>). Antibiotic treatment was only applied in chick drinking water for  
126 the CH + AB group: ADJUSOL<sup>®</sup> TMP SULF Liquid (25 mg/kg sulfadiazine and 5 mg/kg  
127 trimethoprim, VIRBAC, CARROS, France) for 5 days (D2–D6) and SURAMOX 50 (400  
128 mg/10 kg, i.e. 20 mg/kg amoxicillin, VIRBAC) for 5 days (D19–D23). Sex was  
129 determined on tagged chickens on D19, and the number of chickens was adjusted to  
130 a maximum of 16 per pen, keeping a balanced ratio between males and females. On  
131 D27, chickens were challenged by combining transport in boxes to a new room at a  
132 lower temperature (15 °C instead of 25 °C) and 4 h of feed deprivation. On their return  
133 to the original room, the pen size was reduced from 3 m<sup>2</sup> to 1.5 m<sup>2</sup> to increase chicken  
134 density, and birds were orally vaccinated with the live Gumboro vaccine in drinking  
135 water (HIPRAGUMBORO<sup>®</sup> - G97, HIPRA FRANCE, Saint-Herblain, France). Chickens  
136 had ad libitum access to feed without anticoccidial drugs. They were fed with a  
137 standard starter diet (raw energy = 4462 kcal/kg, crude protein = 23.91%) until D19,  
138 then a grower diet from D20 to D34 (4527 kcal/kg, crude protein = 20.51%) and a

139 finisher diet from D35 to D56 (4600 kcal/kg, crude protein = 19.98%). Faeces were  
140 collected from litter on D14 and D54 for parasite analyses.

## 141 **Hatching and husbandry**

### 142 *Hatching conditions*

143 Certified JA 757 18-day embryonated eggs (Galina Vendée, Essarts-en-Bocage,  
144 France) were either placed at 37.6°C with 75% relative humidity and no light in a  
145 conventional hatchery (CH) or laid directly in the litter of the pens under infrared heat  
146 lamps to allow on-farm hatching (OFH). The average temperature of the eggs in the  
147 litter was 37.9°C and under 20 h light per day until OFH chick hatching. The ambient  
148 room temperature was maintained at 25 °C with a fan heater. Day-old CH chicks were  
149 transported for one hour in a transport van before placement in pens to simulate  
150 conventional hatchery processing, which has been described to have long-term  
151 deleterious effects on fear response when combined with delayed nutrition (Hollemans  
152 et al., 2018). Both CH and OFH chicks were placed under heat lamps. In pens hosting  
153 hens, 18-day embryonated eggs or chicks were placed in a gridded space under the  
154 heat lamp. Temperatures under heat lamps were decreased from 35–38 °C to 31–32  
155 °C from D0 to D3, then 29–30 °C from D4 to D6 and 26–27 °C from D7 to D13. The  
156 light cycle was 20 h light at the CH chick placement or until hatching time for OFH chick  
157 (D0), 13 h light on D1 (increased dark time to promote maternal behaviour of hens),  
158 18 h on D2 and 16 h on D3 and during the rearing period with minimum 20 lux on 80%  
159 of the lighted surface.

160 Chicks had ad libitum access to water and food; a wire mesh platform and a perch  
161 were used for environmental enrichment.

162 *Contact with hens*

163 Sixteen Lohmann Brown hens, acting as natural sources of gut microbiota and adult  
164 presence, were obtained from a local commercial egg-laying hen farm (La cabane à  
165 Chiron, Benet, France). The hens were aged 31 weeks, vaccinated against Marek  
166 Disease Virus (MDV), Infectious Bursite Disease Virus (IBDV) and Infectious Bronchitis  
167 Virus (IBV) infections, and were sanitary controlled and declared free of *Mycoplasma*  
168 *gallisepticum*, *Mycoplasma synoviae*, *Chlamydia psittaci* and *Salmonella pullorum*  
169 *gallinarum*. Only *Ascaris* and *Heterakis* parasites were detected in hen faeces, and  
170 they were at a very low level.

171 Each hen was placed separately in a wire-latticed pen (3 m<sup>2</sup>) in the experimental pens  
172 described above with a nest box, perch, feed and water ad libitum. Hens were  
173 accustomed to their new environment for 12 days, fed with a standard rearing diet for  
174 laying hens (30099G25, Arrivé Nutrition Animale, Saint-Fulgent, France) and allowed  
175 to deposit faecal and caecal microbiota on litter. The room temperature was 25 °C and  
176 the artificial photoperiod was 16 h L:8 h D before egg deposition, 20 h L:4 h D during  
177 hatching and the same programme as the chicks afterwards. Two days before chick  
178 arrival or egg hatching, a wire-latticed space for chicks was placed in their pen. Eight  
179 hens were used for 8 groups of 18 OFH chicks, and eight hens were used for 8 groups  
180 of 18 CH chicks. On D0, day-old CH chicks were placed under the pen's wire-latticed  
181 space, and OFH chicks were already under this space. Chicks and hens were in visual  
182 and auditory contact for a few hours. Then hens were deprived of feed and water from  
183 the morning. When lights were switched off, the hens were shut up in their nest boxes,  
184 and chicks were placed under each hen as gently as possible for 11 h without any feed  
185 and water. Chicks and hens were put physically together in a closed nest for the night



186 to promote maternal behaviour and the acceptance of chicks (Richard-Yris &  
187 Leboucher, 1987). The following morning, one hour before the lights were switched on,  
188 the nest-box doors were taken away to allow free access to the whole pen. Free in-  
189 access feed and water were placed under wire-latticed space for chicks and in raised  
190 troughs for hens, not accessible for chicks. Hens were present with chicks for two  
191 weeks, the critical period for chick start, and removed on D15. Weight and clinical  
192 examinations of the hens were recorded the day before they were installed in the pens  
193 and, on D15, when they were removed.

#### 194 **Behavioural observations**

195 The scan sampling method was used to follow the behaviour of hens and chicks on  
196 days 2, 5, 6, 7, 8, 9, 12, 13 and 14 with the following repertoire: resting (the hen is lying  
197 or standing still, eyes closed and without chicks), maintenance (preening, scratching,  
198 stretching), feeding behaviour (the hen is eating or drinking), locomotion, exploration  
199 (the hen is scratching or pecking at the ground or the environment), observation (the  
200 hen is observing the environment with neck movements), maternal behaviour (the hen  
201 is making food offering to the chicks, the hen is expressing maternal calls, the hen is  
202 brooding the chicks by lying down and spreading her wings), fear behaviour (the hen  
203 is flying or running from the experimenter, freezing, alert), agonistic behaviour (the hen  
204 is chasing the chicks, the hen is pecking the chicks, others (punctual behaviours like  
205 vocalisations).

206 To evaluate the proximity between chicks and hens, the experimenter also recorded  
207 the localisation of four randomly tagged chicks and the hen within the pen. To that end,  
208 the pen was virtually divided into four zones (Figure 1). The observations were

209 conducted between 10 AM and noon and between 3 and 5 PM by the same  
210 experimenter. The experimenter walked slowly in front of each pen and recorded the  
211 behaviour of the hen and the localisation of the four tagged chicks every eight minutes  
212 (approximately), with a total of 10 scans per hen per day and 177 scans per hen for  
213 the whole period of observation.

214

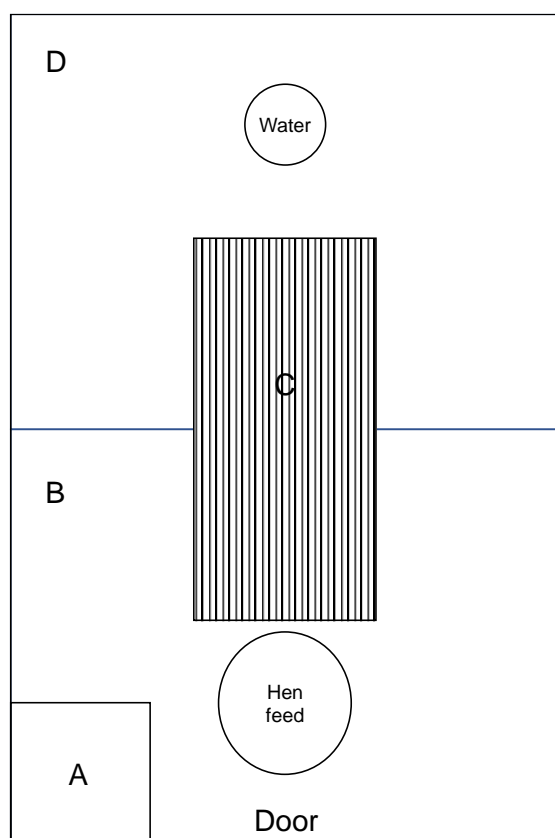

215

216

217 Figure 1. Schematic representation of the pen (3m<sup>2</sup>) with the zones used to locate the  
218 four tagged chicks and the hen during behavioural observations; A: the nest, B and D:  
219 two halves of the pen and C: the wire-latticed space for the chicks (101 × 50 cm).

220

## 221 **Chick quality scores**

222 Chick quality scores were determined at placement in the pen for CH chicks,  
223 corresponding to 21 days of incubation for OFH chicks, on 24 to 25 chicks from the  
224 three treatments: CH, OFH and OFH + H. They were macroscopically defined  
225 according to the grid of Tona (Tona et al., 2003) and modified by adding several other  
226 parameters issued from the CASDAR QUALICOUV project (Guinebretière et al.,  
227 2022). Briefly, the chicks were scored on a total score of 110, including scores of  
228 posture (on 5), down (on 5), legs (on 6), red dot on the beak (on 10), grouped into an  
229 “*appearance*” score (on 26); activity (on 6), eyes (on 16), leg joint inflammation (on 5)  
230 and leg dehydration (on 5) were grouped into a “*tiredness*” score (32), and finally,  
231 retracted yolk (on 12), navel (on 12), remaining membrane (on 12), and remaining yolk  
232 (on 16) were grouped in an “*abdomen*” score (on 52).

## 233 **Health parameters**

234 Droppings deposited on pen litter were collected on D14 and D54 and analysed for  
235 parasite detection (*Coccidia*, *Ascaris* and *Heterakis*). Five grams of droppings were  
236 homogenised in 70 mL of flotation solution (0.36% of sodium chloride). The mixture  
237 was then filtered and pressed through a tea strainer (small mesh) to extract as much  
238 of the liquid part as possible. A homogeneous sample was deposited into a McMaster  
239 cell counter, and after 5 min of rest, the oocysts and nematode eggs were counted,  
240 and their number was expressed per gram of droppings (OPG). Health disorders,  
241 mortality and causes of death were registered during the experiment.

242

## 243 **Performance**

244 Body weight (BW) was measured at D1, D19, D34 and D55. Feed consumption was  
245 measured in each pen for the periods between D1–D19, D19–D34 and D34–D55, and  
246 then used to calculate the feed conversion ratio (FCR) as the feed consumption-to-BW  
247 gain ratio per pen during both periods and the entire rearing period. At D56, 16  
248 identified males per group were slaughtered, and *pectoralis major* and *pectoralis minor*  
249 (breast) muscles were weighed to calculate their yields relative to BW and ultimate pH.  
250 Ultimate pH was measured as the pectoralis major pH 24 hours after slaughter.

## 251 **Statistical analyses**

252 Hatching rates between hatchery and on-farm hatchings were compared using chi-  
253 squared tests. Chick quality parameters were analysed by a non-parametric Kruskal-  
254 Wallis test, considering the treatment (CH, CH + H, OFH and OFH + H), followed by  
255 Mann-Whitney post hoc tests. The normality of residual distribution was checked with  
256 the Shapiro-Wilk test for BW, feed intakes and FCR. A 2-way ANOVA was then carried  
257 out to test the hatching condition and the sex effect, as well as the two-by-two  
258 interactions on performance. When there was an interaction between variables, a  
259 Fisher (LSD) test was used to determine the statistical significance of the difference.  
260 Differences were considered significant when p-values < 0.05 and a tendency for 0.1  
261 < p < 0.05. Analyses were performed using XLSTAT software (version 2015, Addinsoft,  
262 Paris, France).

263 Behavioural data did not meet the assumption of normality and homogeneity of  
264 variances. Non-parametric Mann-Whitney U-tests were used on the mean percentage

265 of scans per behavioural category to compare the behaviour of hens in contact with  
266 CH chicks to the hens in contact with OFH chicks. To compare the proximity of CH and  
267 OFH chicks towards the hen, Mann-Whitney U tests were conducted on the mean  
268 number of tagged chicks located in the same area of the pen as the hen over the 177  
269 scans recorded per hen.

270

## 271 **Results**

### 272 **Behavioural observations**

273 Because 3 hens (1 OFH + H and 2 CH + H) were very aggressive and injured their  
274 chicks, they were removed from the pens and the later behavioural analysis. There  
275 was no significant difference in the behaviour of the hens, regardless of the hatching  
276 condition of chicks, except for the frequency of the behaviour “*observe*”; OFH hens  
277 tended to observe their environment less than CH hens (Table 1).

278

279

280

281

282

283

284

285

286

Table 1. Behaviour of hens according to the chick hatching conditions

| Hen behaviour | Hatching conditions |               | <i>P</i> -value |
|---------------|---------------------|---------------|-----------------|
|               | CH                  | OFH           |                 |
| Agonistic     | 2.54 ± 3.74         | 1.37 ± 0.72   | 0.550           |
| Rest/Comfort  | 17.72 ± 7.16        | 31.16 ± 22.74 | 0.181           |
| Fear          | 7.07 ± 3.39         | 4.92 ± 1.95   | 0.384           |
| Feeding       | 18.10 ± 4.52        | 19.45 ± 11.56 | 0.731           |
| Locomotion    | 6.78 ± 4.12         | 3.39 ± 2.95   | 0.146           |
| Observation   | 17.53 ± 7.45        | 9.52 ± 4.76   | 0.045           |
| Exploration   | 22.62 ± 7.62        | 19.77 ± 10.78 | 0.656           |
| Maternal      | 1.32 ± 1.94         | 3.39 ± 7.98   | 0.732           |
| Others        | 6.32 ± 2.31         | 7.02 ± 7.02   | 0.470           |

CH = conventional hatchery (n = 6), OFH = on-farm hatching (n = 7)

Behaviour observations (mean ± SD of scan percentage over 9 days)

*P*-value < 0.05 = significant difference between hatching conditions (Mann-Whitney U-test)

287

288 To characterise hens' behaviour towards the chicks, each hen was categorised  
 289 according to the frequencies of agonistic or maternal behaviours (Table 2). We defined  
 290 three categories: 1) maternal (M): the hens expressed only maternal behaviours  
 291 towards the chicks; 2) tolerant (T): the hens expressed both maternal and agonistic  
 292 behaviours towards the chicks or less than 2% of scans with maternal behaviour; 3)  
 293 aggressive (A): the hens rejected the chicks and expressed only agonistic behaviour  
 294 towards them. Two hens were defined as maternal, six were tolerant, and five were  
 295 aggressive among the 13 hens analysed (Table 2).

296

297

298

Table 2. Classification of hen according to the frequencies of maternal or agonistic behaviours expressed towards chicks.

| Hatching conditions | Hen behaviours |              | Category |
|---------------------|----------------|--------------|----------|
|                     | Agonistic      | Maternal     |          |
| CH1                 | 7.91 ± 0.27    | 0            | A        |
| CH2                 | 0              | 0.57 ± 0.07  | T        |
| CH3                 | 0.56 ± 0.07    | 0.56 ± 0.07  | T        |
| CH4                 | 0              | 5.08 ± 0.22  | M        |
| CH5                 | 0              | 1.69 ± 0.13  | T        |
| CH6                 | 6.78 ± 0.25    | 0            | A        |
| OFH1                | 1.13 ± 0.11    | 0            | A        |
| OFH2                | 0              | 21.47 ± 0.41 | M        |
| OFH3                | 1.69 ± 0.13    | 0.56 ± 0.07  | T        |
| OFH4                | 1.69 ± 0.13    | 0.56 ± 0.07  | T        |
| OFH5                | 1.13 ± 0.11    | 1.13 ± 0.11  | T        |
| OFH6                | 1.69 ± 0.13    | 0            | A        |
| OHF7                | 2.26 ± 0.15    | 0            | A        |

Thirteen hens were classified, three aggressive hens (1 OFH+H and 2 CH+H) were removed from the analysis  
 CH = conventional hatchery; OFH = on-farm hatching  
 Behaviour observations (mean ± SD of scan percentages over 9 days)  
 A = Aggressive (maternal behaviour = 0)  
 T = Tolerant (0 < maternal behaviour < 5)  
 M = Maternal (maternal behaviour > 5 and agonistic behaviour = 0)

299

300 The mean number of chicks observed in the same area as the hen did not differ  
 301 significantly between CH and OFH chicks ( $p > 0.05$ ). (Figure 2).

302

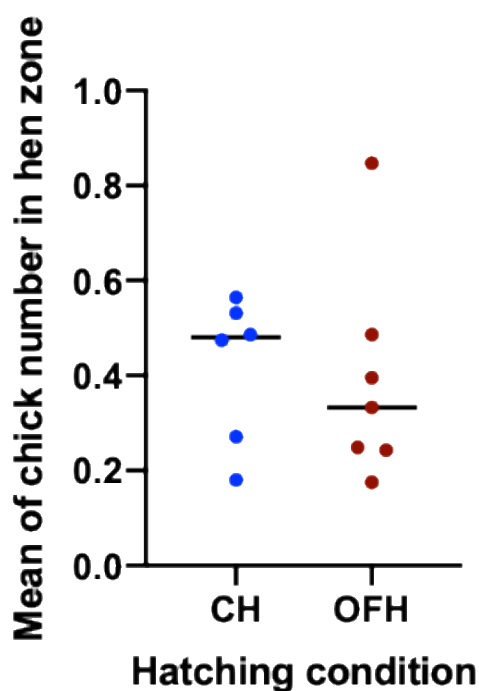

303

304 Figure 2. Proximity between chicks and hens according to hatching conditions; four  
305 chicks were observed per pen ( $n \leq 8$  scans per day) per hatching condition  
306 (conventional hatchery, CH or on-farm hatching, OFH)

### 307 Hatchability and chick quality

#### 308 *Hatchability*

309 For conventional hatchers, 97.7% of CH fertile eggs hatched at E21 and  $97.2\% \pm 4.2\%$   
310 of OFH fertile eggs hatched at E21 in pens. The presence of hens had a significant  
311 impact on the OFH condition ( $p = 0.034$ ). In the presence of hens,  $86.8\% \pm 11.9\%$  of  
312 OFH + H chicks hatched at E21 (Figure 3). Unhatched eggs were mainly found in the  
313 pens with aggressive hens (9/11) or in the OFH pens next to those with aggressive  
314 hens (4/4). No mortality of CH chicks or OFH chicks was observed at hatching,  
315 whereas  $5.6\% \pm 5.9\%$  OFH + H chicks died or were removed at hatching ( $n = 10$ ); due



316 to three hens' aggressiveness or another reason. Only 3.6% (2/56) of chicks had  
317 residual yolk sacs at the age of 20 days (one CH and one CH + AB) and no yolk residue  
318 was found at 56 days.

319

320

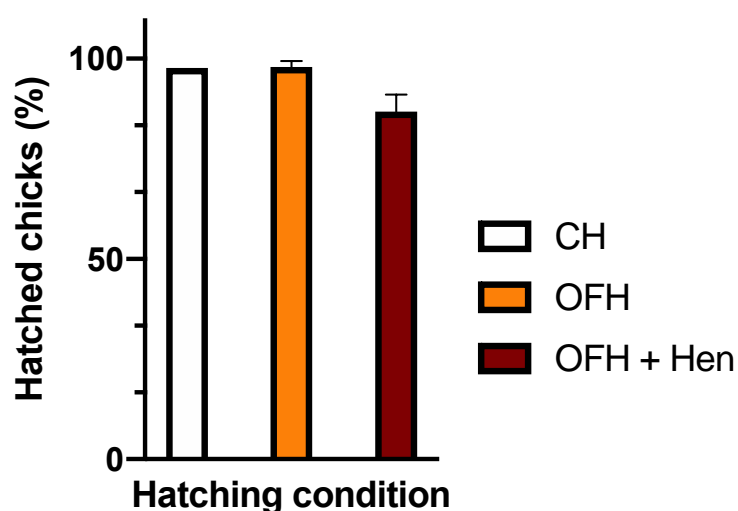

321

322 Figure 3. Number of live hatched chicks according to hatching conditions; conventional  
323 hatchery (CH) condition performed in one hatchery (one value); on-farm hatching  
324 (OFH) and on-farm hatching with hen (OFH + Hen) conditions were repeated in eight  
325 pens each, each pen contained 18 embryonated eggs or chicks; values are expressed  
326 as means ± standard error

### 327 *Quality scores of chicks*

328 Whereas no difference was shown due to the hatching conditions ( $p > 0.05$ ) on the  
329 total quality scores, with good scores in the three groups considered (OFH:  $96.2 \pm 1.5$ ,  
330 CH:  $97.3 \pm 1.5$ ; CH+H:  $95.1 \pm 1.7$ ), when considering the subtotal scores linked to the  
331 appearance, the tiredness or the abdomens of the chicks, it appeared that the subtotal

332 of the appearance score changed depending on the treatment (Figure 4), with the two  
333 other subtotals not being significantly changed ( $p > 0.05$ , data not shown). Indeed,  
334 whereas the subtotal score for appearance was not different between CH chicks or  
335 OFH chicks, it was deteriorated by the presence of the hen within the hatching pen in  
336 OFH chicks ( $p = 0.01$ ).  
337

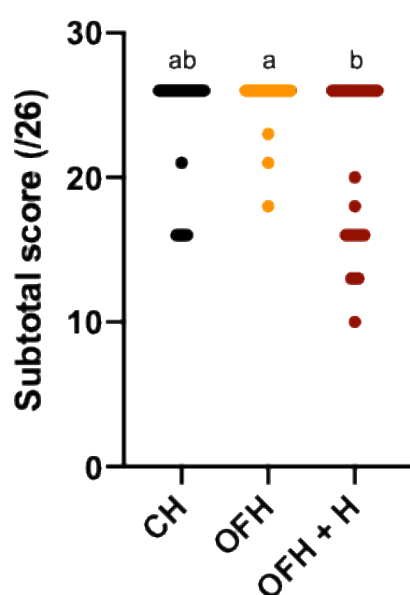

338  
339 Figure 4. Chick appearance subtotal score at the placement in the pen according to  
340 hatching conditions; appearance scores noted on 26 included scores of posture (on  
341 5), down (on 5), legs (on 6), and a red dot on the beak (on 10);  $n = 24$  to  $25$   
342 chicks/hatching condition; conventional hatchery (CH), on-farm hatching (OFH), OFH  
343 + hen (OFH + H)

#### 344 **Performance**

345 Hatching conditions significantly influenced chick BW from hatching to slaughter age.  
346 The OFH chick BW was significantly greater than that of all CH chicks at hatching,

347 whether hens were present or not ( $p \leq 0.002$ , Figure 5). Independently of the treatment,  
348 a sex effect was observed from D19 onwards; male chicken BWs were greater than  
349 those of females (males:  $503 \pm 46\text{g}$ , females:  $469 \pm 37\text{g}$ ,  $p = 0.0001$ ). Treatment of CH  
350 chicks with antibiotics temporarily decreased chicken BW at D19 ( $p = 0.035$ ) (Figure  
351 5) due to a decrease in weight gain (CH:  $497 \pm 38\text{g}$ , CH + AB:  $486 \pm 37\text{g}$ ,  $p = 0.0001$ )  
352 compared to CH chickens, while feed intake (data not shown) and FCR were not  
353 different (Table 3). At D19, OFH chickens had the best BW compared to all other  
354 groups of chicks ( $p \leq 0.0003$ ) (Figure 5). At this time, the presence of hens at hatching  
355 had a remnant negative impact on chicken BW regardless of the hatching condition ( $p$   
356  $< 0.0001$ ), as well as on FCR (Table 3). Both the feed intake per chicken (CH:  $624 \pm$   
357  $12\text{g}^a$ , CH + AB:  $600 \pm 27\text{g}^{ab}$ , CH + H:  $603 \pm 25\text{g}^{bc}$ , OFH:  $652 \pm 33^a$ , OFH + H:  $615 \pm$   
358  $34^c$ ,  $p = 0.001$ ) and the weight gained per chicken (CH:  $455 \pm 37\text{g}^b$ , CH + AB:  $445 \pm$   
359  $37\text{g}^c$ , CH + H:  $421 \pm 40\text{g}^d$ , OFH:  $471 \pm 42\text{g}^a$ , OFH + H:  $425 \pm 47\text{g}^d$ ,  $p = 0.0001$ )  
360 decreased compared to the other groups, and the FCR increased (Table 3). An  
361 interaction between the effect of the hatching condition and chicken sex on BW was  
362 observed later at D34 ( $p = 0.012$ ) and D56 ( $p = 0.022$ ) on BW, even though the FCR  
363 was not affected (Table 3). At D34, a week after the challenge, the OFH male chickens  
364 were the heaviest compared to the other groups ( $p \leq 0.033$ ) and the presence of hens  
365 at hatching harmed chicken BW ( $p \leq 0.0004$ ), regardless of the hatching condition  
366 (Figure 6A). In females, there was no effect of hatching condition or presence of hens  
367 on the BW at D34 (Figure 6A). At slaughter age (D56), there was no effect of hatching  
368 condition on the male chicken BW, but the presence of hens at hatching harmed CH  
369 chicken BW ( $p = 0.0008$ ) (Figure 6B). There was a pen effect in CH + H ( $p = 0.016$ )  
370 and OFH + H chickens ( $p = 0.001$ ), the pen with the lightest CH + H males was in the

371 presence of an aggressive hen, and the heaviest OFH + H males were in a pen in the  
372 presence of a tolerant hen, but all combinations were observed (Figure 7). In females,  
373 there was no effect of the hatching condition on the BW. The presence of hens at  
374 hatching had a positive impact on OFH female chickens compared to CH female  
375 chicken BW ( $p = 0.0096$ ), with the OFH + H chickens being the heaviest compared to  
376 the other CH female conditions (Figure 6B). There was no significant pen effect  
377 between CH + H and OFH + H female chickens ( $p = 0.447$ ).  
378

Table 3. Performance according to the hatching conditions of chicks

| Day ranges | Feed conversion ratio (g/g) |                |                 |                 |                |       |
|------------|-----------------------------|----------------|-----------------|-----------------|----------------|-------|
|            | CH                          | CH + AB        | CH + H          | OFH             | OFH + H        |       |
| D1–D19     | 1.370 ± 0.024c              | 1.350 ± 0.066c | 1.416 ± 0.049ab | 1.388 ± 0.022bc | 1.447 ± 0.035a | 0.001 |
| D20–D34    | 1.807 ± 0.030               | 1.773 ± 0.042  | 1.769 ± 0.039   | 1.795 ± 0.035   | 1.787 ± 0.057  | 0.355 |
| D35–D55    | 2.194 ± 0.091               | 2.213 ± 0.055  | 2.188 ± 0.054   | 2.201 ± 0.049   | 2.141 ± 0.038  | 0.173 |
| D1–D55     | 1.904 ± 0.036               | 1.902 ± 0.025  | 1.913 ± 0.040   | 1.910 ± 0.022   | 1.912 ± 0.015  | 0.924 |

Hatching conditions: conventional hatchery (CH), CH + antibiotics treatment (CH + AB), CH + hen (CH + H), on-farm hatching (OFH), OFH + hen (OFH + H)

Values are expressed as mean ± standard error

a,b,c, Different letters correspond to significant differences between treatment groups

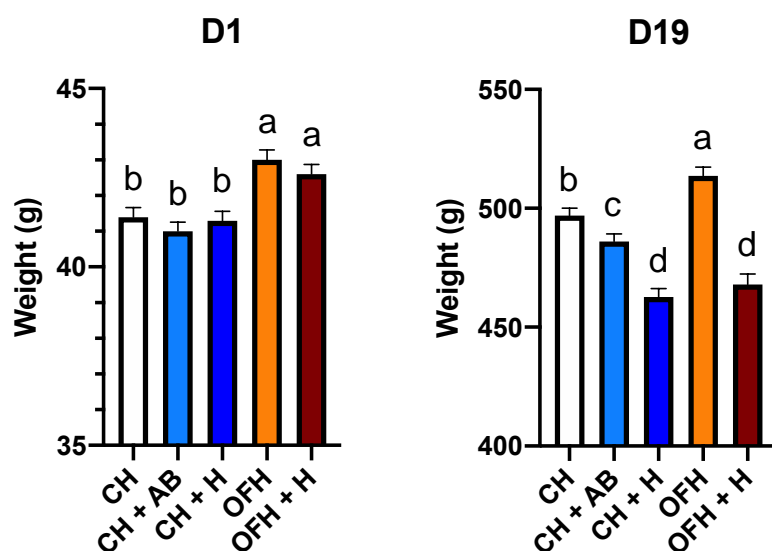

380

381 Figure 5. Body weight at D1 and D19 and according to the hatching conditions:

382 conventional hatchery (CH), CH + antibiotics treatment (CH + AB), CH + hen (CH +

383 H), on-farm hatching (OFH), OFH + hen (OFH + H); values are expressed as means  $\pm$

384 standard error; different letters correspond to significant differences between treatment

385 groups

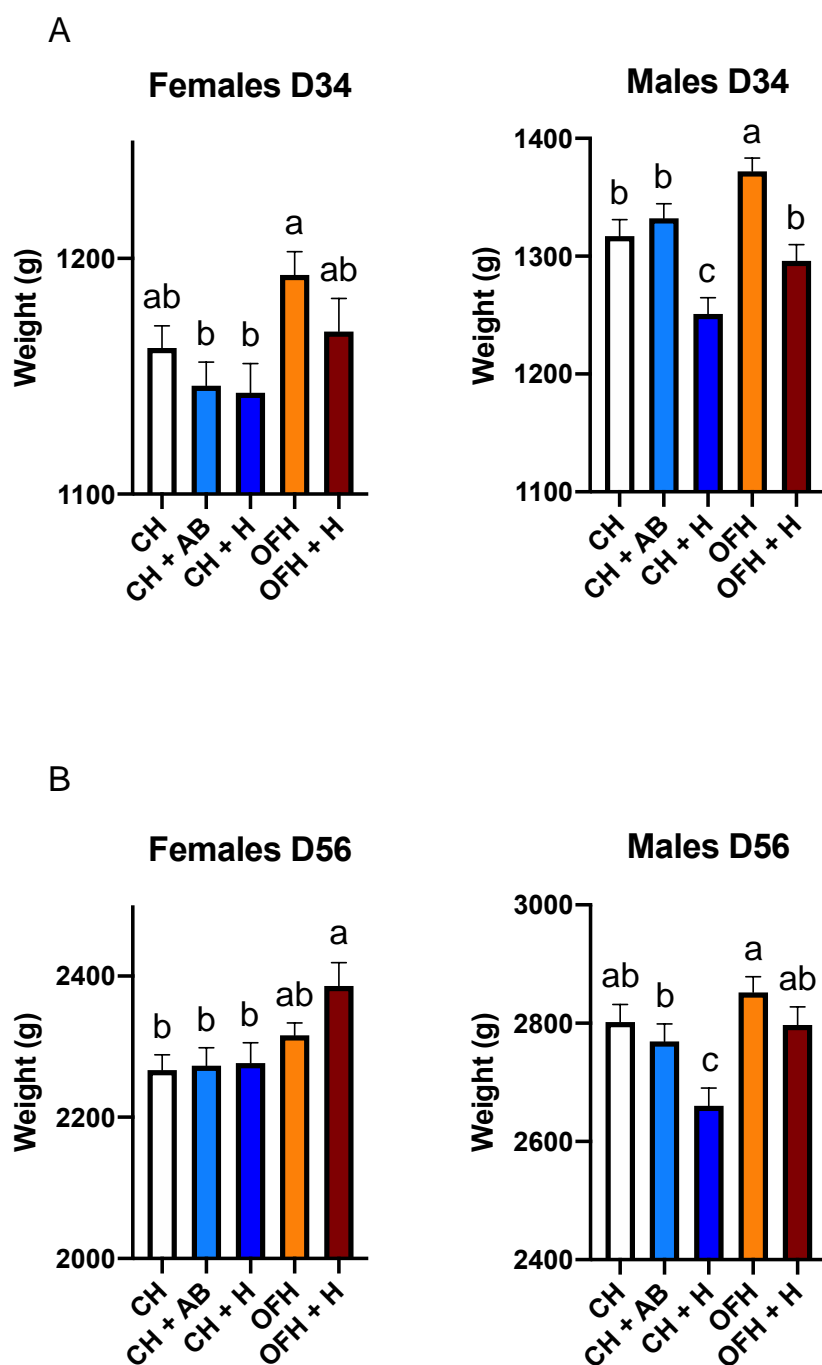

386

387 Figure 6. Weight at D34 (A) and D56 (B) of male and female chickens according to the  
388 hatching conditions: conventional hatchery (CH), CH + antibiotics treatment (CH + AB),  
389 CH + hen (CH + H), on-farm hatching (OFH), OFH + hen (OFH + H); values are  
390 expressed as mean  $\pm$  standard error: different letters correspond to significant  
391 differences between treatment groups

392

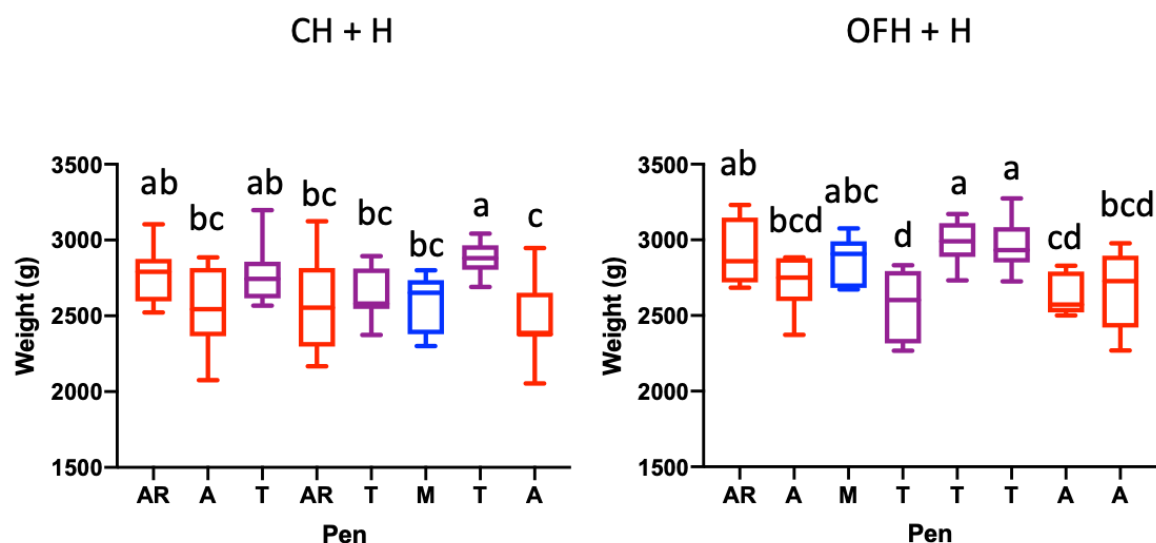

393

394 Figure 7. Body weight at D56 of male chickens according to the behaviour of the hen  
395 present at the starting period, M: maternal, T: tolerant, A: aggressive, AR: aggressive  
396 and removed from the pen; CH + H: chicks hatched in the hatchery and in the presence  
397 of hens; OFH + H: chicks hatched on-farm in the presence of hens; median  $\pm$  SD ( $n \leq$   
398 9).

399

400 Breast weight was not affected by the hatching conditions ( $6.99 \pm 0.06$ ,  $p = 0.357$ ) and  
401 ultimate pH was not modified either ( $5.7 \pm 0.1$ ,  $p = 0.951$ ).

## 402 Health and robustness

403 *Coccidia* was detected in variable amounts in the droppings of all the pens at D54  
404 (200–85500 OPG) without any significant effect of the hatching conditions in the  
405 presence of hen or not ( $p = 0.606$ ). No clinical signs were observed during the  
406 experiment. In all hatching conditions combined, the viability rate of the chickens was  
407 95.3%. The mortality rate during the whole experiment was 3.19% (23/720). Seventeen



408 chicks died during the first week of life, 11 OFH + H and 5 CH + H in the presence of  
409 hens and one OFH chick for an unknown reason. Six CH chickens died during the rest  
410 of the experiment, five of which were due to heart problems (2 CH, 1 CH + AB, 2 CH  
411 + H) and one to unknown causes (CH + H). Eleven chicks were additionally eliminated  
412 after hatching in pens in the presence of hens (4 at D1, 4 at D2, and 1 at D4) and two  
413 later (D33 and D55) for morphological reasons.

414

## 415 **Discussion**

416 New hatching systems are being developed in Europe, and the enrichment of the  
417 rearing environment is also in full development, notably by optimising the microbial  
418 environment of the chicks to limit the use of antibiotics. In this study, we analysed the  
419 benefits/risks of hatching systems (OFH and CH, treated with antibiotics or not) and of  
420 the presence of an adult hen or not on hatchability, chick quality score, performance,  
421 health and robustness.

## 422 **Hatching conditions**

423 The BW of OFH-certified JA757 chicks was significantly greater than that of CH chicks  
424 at hatching, even though the hatchability rate and the quality score of chicks were  
425 comparable between the two conditions, and no mortality was reported. These results  
426 agree with other studies on OFH performed in slow (Jessen et al., 2021) and fast-  
427 growing broilers (de Jong et al., 2020; Souza da Silva et al., 2021) for the BW but not  
428 for other parameters that were reported higher for the hatchability, lower for the quality  
429 score of chicks and lower for the mortality. However, whereas there was no effect of  
430 hatching conditions, the presence of hens, categorised according to their behaviour,

431 decreased the hatchability rate, the appearance quality score of OFH chicks and  
432 increased mortality at hatching. These degraded indicators could be since in our  
433 experimental design, very few hens expressed a clear maternal behaviour towards the  
434 chicks ( $n = 2/16$ ), and some even showed agonistic behaviour. This may be explained  
435 by the genetic line of hens used (Lohmann Brown), which is highly selected for laying  
436 and counter-selected for brooding. However, this genetic line was chosen because the  
437 studied practice could favour the possibility to use culled hens in breeding, and  
438 because of their rather tolerant social behaviour, their brooding behaviour could be  
439 optimised. Improvements could be obtained by carrying it out in a season with days  
440 with greater light amplitudes (spring) to facilitate brooding behaviour, which was not  
441 the case in this study (winter), and by selecting hens with brooding behaviour to  
442 facilitate maternal behaviour (Shimmura et al., 2010). In addition, in our experimental  
443 design, the chicks had to feed under the wire-lattice space, which was not accessible  
444 to the hen. As they obtained both food and warmth under this space, the hens probably  
445 did not have enough tactile stimulation from the chicks to fully express their maternal  
446 behaviour with no agonistic behaviour. Indeed, in addition to the physiological state,  
447 tactile stimulations from chicks play an important role in the expression and  
448 maintenance of maternal behaviour in hens (Richard-Yris & Leboucher, 1987).

#### 449 **Starting period**

450 Hatching conditions and the presence of hens for 15 days after placement significantly  
451 influenced chick performance during the starting period. At D19, OFH chicks had the  
452 best BW compared to the other groups. and the presence of hens at hatching harmed  
453 chicken BW regardless of the hatching condition and on FCR. No significant  
454 differences were observed in the behaviour of hens present with OFH and CH chicks,

455 except for OFH hens, which were found to observe their environment less than CH  
456 hens. With our small sample size, this result could be explained by the behaviour of  
457 one OFH hen, which spent much of the time resting. The CH and OFH chicks did not  
458 differ in their proximity towards the hen. The mean number of chicks observed in the  
459 same area as the hen was very low (less than 1 chick), indicating that they were rarely  
460 in contact with the hen. However, chick performance was affected by the presence of  
461 the hens, including lower feed intake and consequently lower weight gain and higher  
462 FCR. This could be explained by the agonistic behaviour of some hens towards chicks,  
463 the attempt of the hens to eat the chick feed and the stress that this may have caused  
464 the chicks.

465 Treatment of CH chicks with antibiotics, assessed as growth promoters, temporarily  
466 decreased chicken BW at D19, but FCR was not modified. This effect was not  
467 observed later, but growth promotion was not observed in CH chicks treated with  
468 antibiotics. This result is not in agreement with the use of antibiotics as growth  
469 promoters in farm animals, but the relative lack of published data on chicken  
470 performance limits knowledge of the actual effects of antibiotics on animal performance  
471 (Kumar et al., 2018; Broom, 2018). Their effects also result from their interaction with  
472 the microbiota and the variables chosen in the experimental studies. The effects  
473 observed in farms are dependent on the sanitary conditions present, which are  
474 different from the much more controlled sanitary conditions in the experimental studies  
475 and may contribute to different effects of treatment with antibiotics.

#### 476 **Growth period**

477 An interaction between the effect of hatching conditions and chicken sex was observed  
478 on BW after the challenge on D27. In males, the OFH chicken group was the heaviest

479 compared to the other groups at D34 but not at D56. These results are consistent with  
480 a previous study that observed the beneficial effects of OFH on BW only until D21 (de  
481 Jong et al., 2020), and not until slaughter time, as reported in various studies when  
482 post-hatching feed deprivation time was at least 36 h (de Jong et al., 2017).  
483 Alternatively, this may also be a result of the response to the challenge experienced  
484 by the chickens at D27, including transport, exposure to low temperature, transient  
485 feed deprivation, vaccination and a change to a higher rearing density, but the fact is  
486 that there is no ultimate positive impact of OFH on BW at slaughter time. Moreover, in  
487 our conditions, the presence of hens eventually negatively impacted male chicken BW,  
488 but only for CH chickens at D56. In females, there was no effect of hatching conditions  
489 on the BW at D34 and D56, and the presence of hens eventually had a positive impact  
490 on OFH female chicken BW. These results were unexpected, but it is known that early  
491 stress induces sex-specific, immediate and life-long effects on the stress response,  
492 behaviour, sex hormones, and hypothalamic and blood gene expression in chickens  
493 (Madison et al., 2008; Elfving et al., 2015; Foury et al., 2020), with the males being  
494 more reactive than the females. The results observed in this study raise questions  
495 about the consequences of hatching conditions in the presence of a hen according to  
496 the sex of the chicks. It appeared that male OFH chicks developed more fear and  
497 stress responses than females when placed in the presence of a hen that was not their  
498 mother, and this had effects on their growth until slaughter age. For male OFH chicks,  
499 in which the effect of hen presence on their growth was only observed during the  
500 growth phase, there was possibly communication between hens and embryonated  
501 eggs before hatching and with chicks at hatching that may have increased their fear  
502 and stress responses and therefore harmed their growth. This could even have had  
503 negative consequences on hatchability and mortality rates, but the sex of the chicks

504 was not recorded at that time. The presence of hens with the female OFH chicks did  
505 not affect their performance and even had a beneficial effect on their growth at  
506 slaughter age. These differences observed between treatments and chick sexes for  
507 performance are not likely explained by a difference in proximity between hens and  
508 chicks, which was low in this experiment.

## 509 **Health and Robustness**

510 There were no effects of hatching conditions on health parameters (parasitic load,  
511 clinical signs, rate of mortality), even after exposure of chickens during their growth  
512 phase to an environmental and vaccine challenge. However, this challenge could have  
513 accentuated the differences in the effects of hatching conditions on performance  
514 parameters between males and females, but we did not perform the unchallenged  
515 rearing conditions to assert this. The implantation of adult microbiota into the chick  
516 digestive system by the presence of hens should be nevertheless beneficial for the  
517 maturation of the chick microbiota and gut immune system and still needs to be  
518 assessed.

519 Altogether, on-farm hatching of certified broilers was a hatching system at least  
520 equivalent to the hatchery hatching system, if not better, in this study. The effects of  
521 the hens' presence at hatching and during the chick start-up phase on performance  
522 interacted with the hatching condition and the sex of the chickens. In this case, the  
523 health status and brooding behaviour of the hens are essential to ensure the health  
524 and welfare of the chicks. These practices offer possible evolutions of the rearing  
525 conditions to continue to decrease the use of antibiotics.

526

## 527 **Ethics approval**

528 All experimental procedures were approved by the Ethics Committee COMETHEA  
529 POITOU-CHARENTES n°84 (APAFIS#24474-2020021816237418 v3) and carried out  
530 following current European legislation (EU Directive 2010/63/EU).

## 531 **Author contributions**

532 LAG, AB, CS, KG and AC designed the study with the help of CB. LAG, CB and AC  
533 performed the experiment with the technical help of SC for the organisation of the  
534 experiment and AH for parasitic analyses. CB and LR collected the performance and  
535 health parameters. LAG analysed data with the help of AB and CB for the behaviour  
536 data. LAG, AB and CB wrote the paper with the help of KG and AC. All the authors  
537 reviewed and approved the manuscript.

538

## 539 **Author ORCIDs**

540 LG: <https://orcid.org/0000-0001-7089-2196>

541 AB: <https://orcid.org/0000-0001-5647-1758>

542 CB: <https://orcid.org/0000-0003-1181-992X>

543 CS: <https://orcid.org/0000-0002-3480-6278>

544 KG: <https://orcid.org/0009-0005-6638-9404>

545 AC: <https://orcid.org/0000-0002-3410-6108>

546

## 547 **Acknowledgements**

548 We are grateful to all the members of the RIMEL network whose shared thinking made  
549 the design of this study possible. We thank the staff of the poultry alternative breeding  
550 experimental unit (EASM, INRAE, 17700 Surgères, France, DOI:  
551 10.15454/1.5572418326133655E12) for the development of the experimental set-up  
552 and the conduct of the experimentation. We are very grateful to the staff of the MOQA  
553 team (INRAE, 37380 Nouzilly, France) for their help during the experimentation. The  
554 manuscript has been professionally proofread.

## 555 **Funding**

556 This research was supported by a grant from INRAE, Department of Animal Physiology  
557 and Livestock Systems for the RIMEL network.

## 558 **Data and model availability statement**

559 The datasets used during the current study are available on line:

560 <https://doi.org/10.57745/6INVYL>

561

## 562 **References**

563 Beauclercq S, Lefèvre A, Montigny F, Collin A, Tesseraud S, Leterrier C, Emond P,  
564 Guilloteau LA (2019) A multiplatform metabolomic approach to characterize fecal  
565 signatures of negative postnatal events in chicks: a pilot study. J Anim Sci  
566 Biotechnol, 10, 21. <https://doi.org/10.1186/s40104-019-0335-8>

- 567 Broom LJ (2018) Gut barrier function: Effects of (antibiotic) growth promoters on key  
568 barrier components and associations with growth performance. *Poult Sci*, 97,  
569 1572-1578. <https://doi.org/10.3382/ps/pey021>
- 570 Broom LJ, Kogut MH (2018) The role of the gut microbiome in shaping the immune  
571 system of chickens. *Vet Immunol Immunopathol*, 204, 44-51.  
572 <https://doi.org/10.1016/j.vetimm.2018.10.002>
- 573 de Jong IC, van Riel J, Bracke MBM, van den Brand H (2017) A 'meta-analysis' of  
574 effects of post-hatch food and water deprivation on development, performance  
575 and welfare of chickens. *PLoS One*, 12, e0189350.  
576 <https://doi.org/10.1371/journal.pone.0189350>
- 577 de Jong IC, Gunnink H, van Hattum T, van Riel JW, Raaijmakers MMP, Zoet ES, van  
578 den Brand H (2019) Comparison of performance, health and welfare aspects  
579 between commercially housed hatchery-hatched and on-farm hatched broiler  
580 flocks. *Animal*, 13, 1269-1277. <https://doi.org/10.1017/S1751731118002872>
- 581 de Jong IC, van Hattum T, van Riel JW, De Baere K, Kempen I, Cardinaels S, Gunnink  
582 H (2020) Effects of on-farm and traditional hatching on welfare, health, and  
583 performance of broiler chickens. *Poult Sci*, 99, 4662-4671.  
584 <https://doi.org/10.1016/j.psj.2020.06.052>.
- 585 Edgar J, Held S, Jones C, Troisi C (2016) Influences of maternal care on chicken  
586 welfare. *Animals (Basel)*, 6, 2. <https://doi.org/10.3390/ani6010002>
- 587 Elfving M, Nätt D, Goerlich-Jansson VC, Persson M, Hjelm J, Jensen P (2015) Early  
588 stress causes sex-specific, life-long changes in behaviour, levels of gonadal  
589 hormones, and gene expression in chickens. *PLoS One*, 10, e0125808.  
590 <https://doi.org/10.1371/journal.pone.0125808>



- 591 Fortun-Lamothe L, Collin A, Combes S, Ferchaud S, Germain K, Guilloteau L, Gunia  
592 M, Lefloc'h N, Manoli C, Montagne L, Saviotto D (2023) Principes, cadre  
593 d'analyse et leviers d'action à l'échelle de l'élevage pour une gestion intégrée de  
594 la santé chez les animaux monogastriques. *INRAE Prod Anim*, 35, 307–326.  
595 <https://doi.org/10.20870/productions-animales.2022.35.4.7225>
- 596 Foury A, Collin A, Helbling JC, Leterrier C, Moisan MP, Guilloteau LA (2020)  
597 Spontaneous intake of essential oils after a negative postnatal experience has  
598 long-term effects on blood transcriptome in chickens. *Sci Rep*, 10, 20702.  
599 <https://doi.org/10.1038/s41598-020-77732-5>
- 600 Giersberg M F, Poolen I, de Baere K, Gunnink H, van Hattum T, van Riel J W, de Jong  
601 IC (2020). Comparative assessment of general behaviour and fear-related  
602 responses in hatchery-hatched and on-farm hatched broiler chickens. *Appl Anim  
603 Behav Sci*, 232, 105100. <https://doi.org/10.1016/j.applanim.2020.105100>
- 604 Giersberg MF, Molenaar R, de Jong IC, Souza da Silva C, van den Brand H, Kemp B,  
605 Rodenburg TB (2020) Effects of hatching system on the welfare of broiler  
606 chickens in early and later life. *Poult Sci*, 100, 100946.  
607 <https://doi.org/10.1016/j.psj.2020.12.043>
- 608 Guinebretière M, Puterflam J, Keïta A, Réhault-Godbert S, Thomas R, Chartrin P,  
609 Cailleau-Audouin E, Coudert E, Collin A (2022) Storage temperature or thermal  
610 treatments during long egg storage duration influences hatching performance  
611 and chick quality. *Front Physiol*, 13, 852733.  
612 <https://doi.org/10.3389/fphys.2022.852733>
- 613 Hewlett SE, Nordquist RE (2019) Effects of maternal care during rearing in White  
614 Leghorn and Brown Nick Layer Hens on cognition, sociality and fear. *Animals  
615 (Basel)*, 9, 454. <https://doi.org/10.3390/ani9070454>

- 616 Hollemans MS, de Vries S, Lammers A, Clouard C (2018) Effects of early nutrition and  
617 transport of 1-day-old chickens on production performance and fear response.  
618 *Poult Sci*, 97, 2534-2542. <https://doi.org/10.3382/ps/pey106>
- 619 Jessen CT, Foldager L, Riber AB (2021) Effects of hatching on-farm on performance  
620 and welfare of organic broilers. *Poult Sci*, 100, 101292.  
621 <https://doi.org/10.1016/j.psj.2021.101292>
- 622 Kumar S, Chen C, Indugu N, Werlang GO, Singh M, Kim WK, Thippareddi H (2018)  
623 Effect of antibiotic withdrawal in feed on chicken gut microbial dynamics,  
624 immunity, growth performance and prevalence of foodborne pathogens. *PLoS*  
625 *One*, 13, e0192450. <https://doi.org/10.1371/journal.pone.0192450>
- 626 Madison FN, Jurkevich A, Kuenzel WJ (2008) Sex differences in plasma corticosterone  
627 release in undisturbed chickens (*Gallus gallus*) in response to arginine vasotocin  
628 and corticotropin releasing hormone. *Gen Comp Endocrinol*, 155, 566-573.  
629 <https://doi.org/10.1016/j.ygcen.2007.08.014>
- 630 Meijerink N, Kers JG, Velkers FC, van Haarlem DA, Lamot DM, de Oliveira JE, Smidt  
631 H, Stegeman JA, Rutten VPMG, Jansen CA (2020) Early life inoculation with  
632 adult-derived microbiota accelerates maturation of intestinal microbiota and  
633 enhances NK cell activation in broiler chickens. *Front Vet Sci*, 7, 584561.  
634 <https://doi.org/10.3389/fvets.2020.584561>
- 635 Perré Y, Wauters A-M, Richard-Yris M-A (2002) Influence of mothering on emotional  
636 and social reactivity of domestic pullets. *Appl Anim Behav Sci*, 75, 133-146.  
637 [https://doi.org/10.1016/S0168-1591\(01\)00189-7](https://doi.org/10.1016/S0168-1591(01)00189-7)
- 638 Richard-Yris MA, Leboucher G (1987) Responses to successive test of induction of  
639 maternal behaviour in hens. *Behav Processes*, 15, 17-26.  
640 [https://doi.org/10.1016/0376-6357\(87\)90030-1](https://doi.org/10.1016/0376-6357(87)90030-1)

- 641 Shimmura T, Kamimura E, Azuma T, Kansaku N, Uetake K, Tanaka T (2010) Effect of  
642 broody hens on behaviour of chicks. *Appl Anim Behav*, 126, 125-133.  
643 <https://doi.org/10.1016/j.applanim.2010.06.011>
- 644 Souza da Silva C, Molenaar R, Giersberg MF, Rodenburg TB, van Riel JW, De Baere  
645 K, Van Dosselaer I, Kemp B, van den Brand H, de Jong IC (2021) Day-old chicken  
646 quality and performance of broiler chickens from 3 different hatching systems.  
647 *Poult Sci*, 100, 100953. <https://doi.org/10.1016/j.psj.2020.12.050>
- 648 Tona K, Bamelis F, De Ketelaere B, Bruggeman V, Moraes VM, Buyse J, Onagbesan  
649 O, Decuypere E (2003) Effects of egg storage time on spread of hatch, chick  
650 quality, and chick juvenile growth. *Poult Sci*, 82, 736-741.  
651 <https://doi.org/10.1093/ps/82.5.736>
- 652 van de Ven LJ, van Wagenberg AV, Groot Koerkamp PW, Kemp B, van den Brand H  
653 (2009) Effects of a combined hatching and brooding system on hatchability, chick  
654 weight, and mortality in broilers. *Poult Sci*, 88, 2273-2279.  
655 <https://doi.org/10.3382/ps.2009-00112>
- 656 van der Wagt I, de Jong IC, Mitchell MA, Molenaar R, van den Brand H (2020) A review  
657 on yolk sac utilization in poultry. *Poult Sci*, 99, 2162-2175.  
658 <https://doi.org/10.1016/j.psj.2019.11.041>
- 659 Volf J, Polansky O, Varmuzova K, Gerzova L, Sekelova Z, Faldynova M, Babak V,  
660 Medvecký M, Smith AL, Kaspers B, Velge P, Rychlík I (2016) Transient and  
661 prolonged response of chicken cecum mucosa to colonization with different gut  
662 microbiota. *PLoS One*, 11, e0163932.  
663 <https://doi.org/10.1371/journal.pone.0163932>
